# Supplementary material for: Bamboo Leaf Flavonoids Suppress Oxidative Stress-Induced Senescence of HaCaT Cells and UVB-Induced Photoaging of Mice through p38 MAPK and Autophagy Signaling
Source: MDPI journal article supplement (doi:10.3390/nu14040793), 2022-02-14
Supplement: s1 [file s1]

# Bamboo leaf flavonoids suppress oxidative stress-induced senescence of HaCaT cells and UVB-induced photoaging of mice through p38 MAPK and autophagy signaling

**Table S1 Formulation of emulsion.** Mix the components of phase A and phase B uniformly. After heating to 80°C, slowly pour phase A into phase B. After homogenizing (2000 rpm/min, 5 min), stir and cool down to 40°C, then add phase C and D in sequence, stir evenly.

| Phase | Component              | Mass fraction (%) |
|-------|------------------------|-------------------|
| A     | Isopropyl myristate    | 3.00              |
|       | Polydimethylsiloxane   | 3.00              |
|       | Liquid paraffin        | 1.00              |
|       | Glyceryl stearatese    | 1.00              |
|       | Cetearyl alcohol       | 1.50              |
|       | Sucrose stearate ester | 2.00              |
| B     | Glycerin               | 4.00              |
|       | Butanediol             | 3.00              |
|       | Xanthan gum            | 0.10              |
|       | EDTA-2Na               | 0.03              |
|       | Pure water             | to 100            |
| C     | Methyl isothiazolinone | 0.10              |
| D     | BLF                    | 2.5, 5.0          |

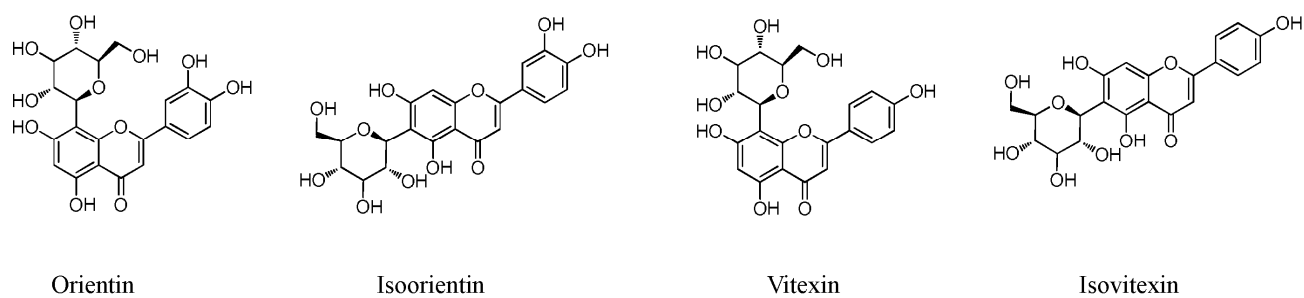

**Figure S1** The chemical structure of orientin, isoorientin, vitexin and isovitexin.

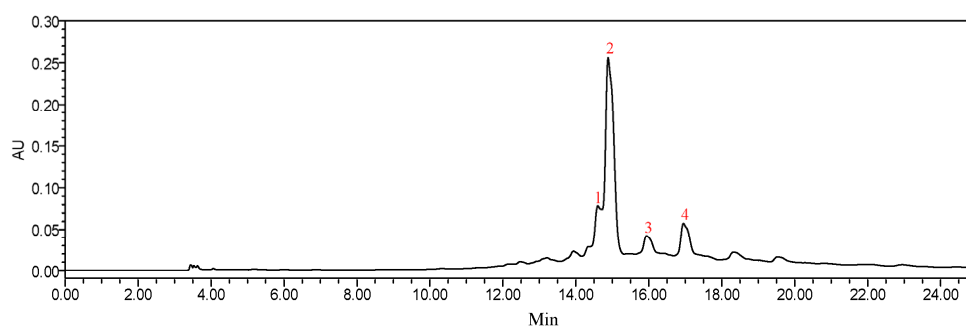

| Peak | Flavonoid compound | Retention time | Area    | Height | % Area |
|------|--------------------|----------------|---------|--------|--------|
| 1    | isoorientin        | 14.680         | 1028577 | 63027  | 10.64  |
| 2    | orientin           | 14.965         | 3956320 | 214205 | 40.92  |
| 3    | isovitexin         | 16.019         | 1511659 | 34918  | 15.63  |
| 4    | vitexin            | 17.033         | 1302318 | 45940  | 13.47  |

**Figure S2** Liquid chromatogram of bamboo leaf flavonoids prepared in our laboratory.

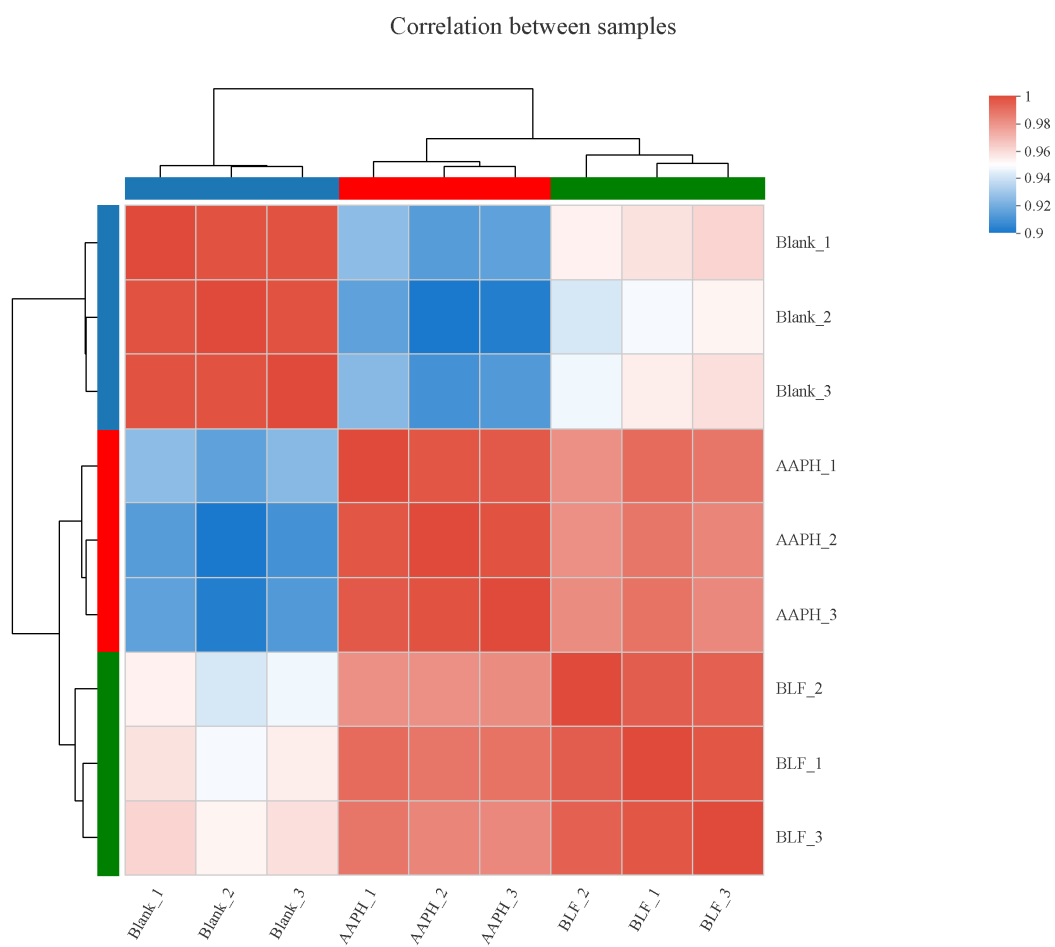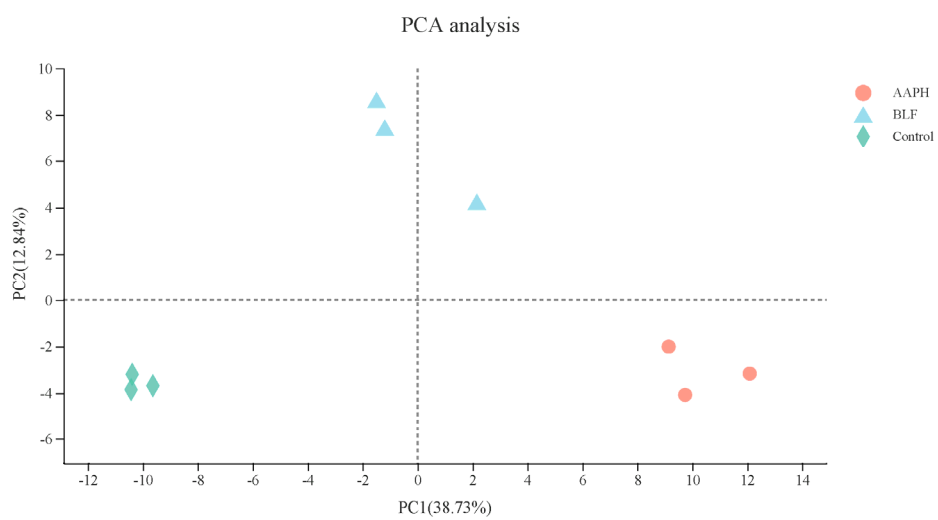

**Figure S3** Correlation and PCA analysis among samples.

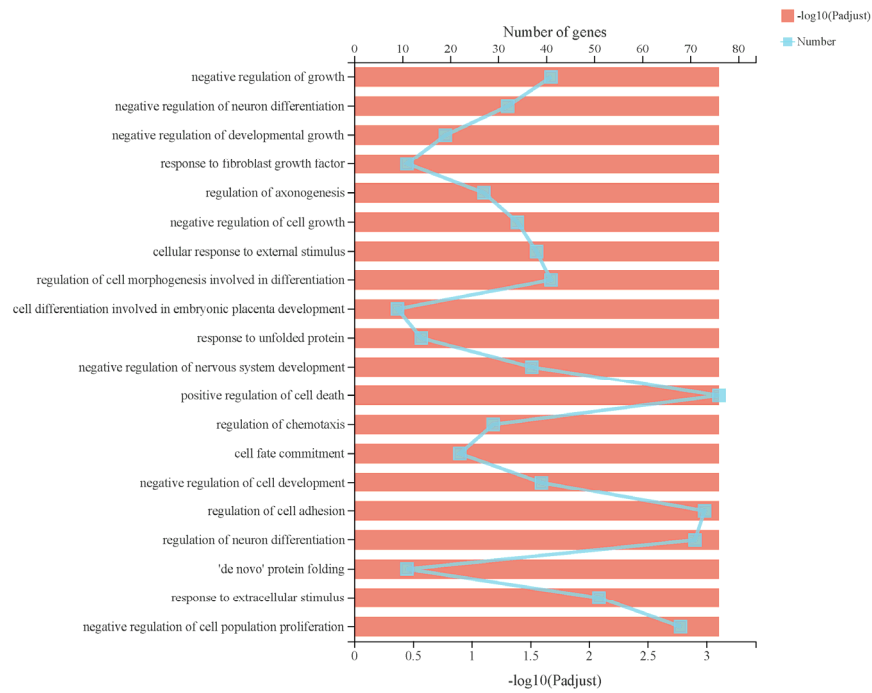

**Figure S4** GO analysis between control and AAPH groups.

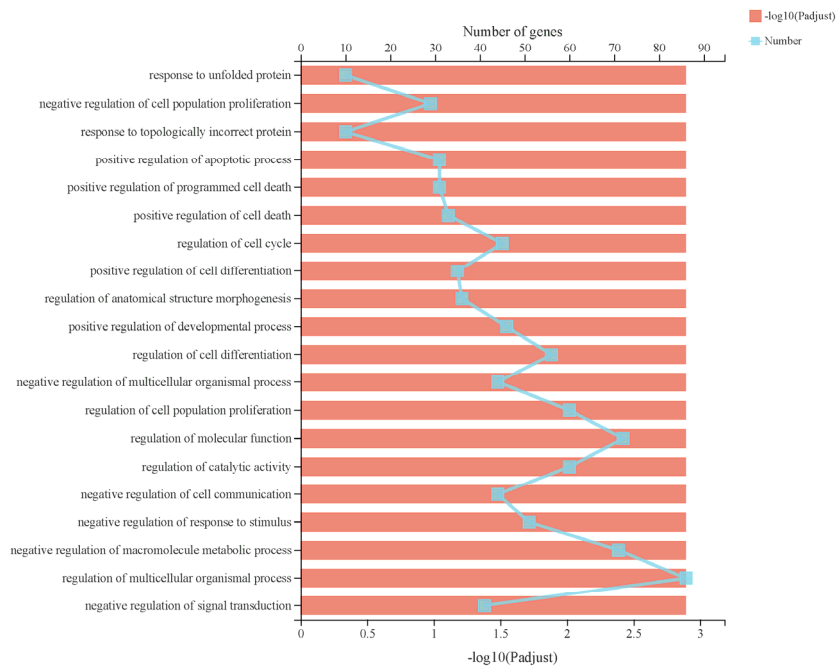

**Figure S5** GO analysis between AAPH and AAPH + BLF groups.

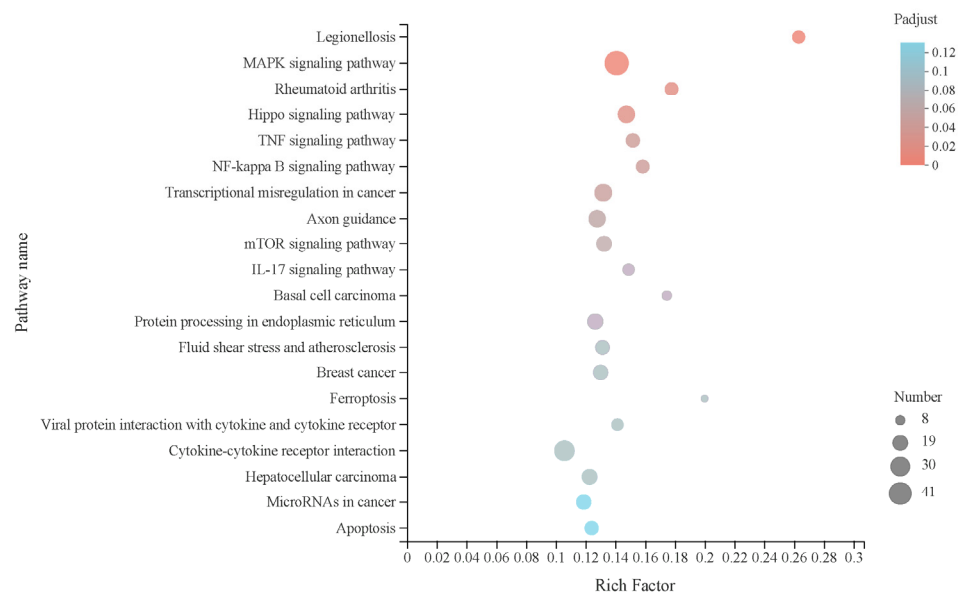

**Figure S6** KEGG analysis between control and AAPH groups.
